# Supplementary material for: Recurrent HOXB13 mutations in the Dutch population do not associate with increased breast cancer risk
Source: PubMed Central journal article supplement (PMC4948019; doi:10.1038/srep30026), 2016-07-18
Supplement: srep30026-s1.pdf [file srep30026-s1.pdf]

# **Recurrent *HOXB13* mutations in the Dutch population do not associate with increased breast cancer risk**

Jingjing Liu, Wendy J.C. Prager – van der Smissen, Marjanka K. Schmidt, J. Margriet Collée,  
Sten Cornelissen, Roy Lamping, Anja Nieuwlaat, John A. Foekens, Maartje J. Hooning,  
Senno Verhoef, Ans M.W. van den Ouweland, Frans B.L. Hogervorst, John W.M. Martens,  
Antoinette Hollestelle.

**Supplementary Data**

**Supplementary Table 1** PCR and sequencing primers for the *HOXB13* gene

|                | <b>Exon 1</b>             | <b>Exon 2</b>              |
|----------------|---------------------------|----------------------------|
| Forward primer | 5'-GGCCCCTGCGTCTCTTG-3'   | 5'-CTGGTATGCTTTGGAGGAAC-3' |
| Reverse primer | 5'-GAGGAGCACCAAGCTCATC-3' | 5'-GGCCGCTCCTGAGGAAC-3'    |

**Supplementary Table 2** Primers and reporter probes for *HOXB13* Taqman genotyping assays

|                    | <b><i>HOXB13</i> c.251G&gt;A (p.G84E)</b> | <b><i>HOXB13</i> c.649C&gt;T (p.R217C)</b> |
|--------------------|-------------------------------------------|--------------------------------------------|
| Forward primer     | 5'- GGAGCCGCCAAAGCAAT -3'                 | 5'- CCTTTTCCTCCCTCCCTTTCAC -3'             |
| Reverse primer     | 5'- CGAGCTCCGGGACACT-3'                   | 5'- TCCAGCTCCCGCAACTG-3'                   |
| VIC reporter probe | 5'- CCGCCTCCAAAGTA -3'                    | 5'- CGTTTCTTGCGGCCGC -3'                   |
| FAM reporter probe | 5'- CCGCCTTCAAAGTA -3'                    | 5'- CGTTTCTTGCAGCCGC -3'                   |
